# Supplementary material for: Cryptosporidium Priming Is More Effective than Vaccine for Protection against Cryptosporidiosis in a Murine Protein Malnutrition Model
Source: PubMed Central journal article supplement (PMC4965189; doi:10.1371/journal.pntd.0004820), 2016-07-28

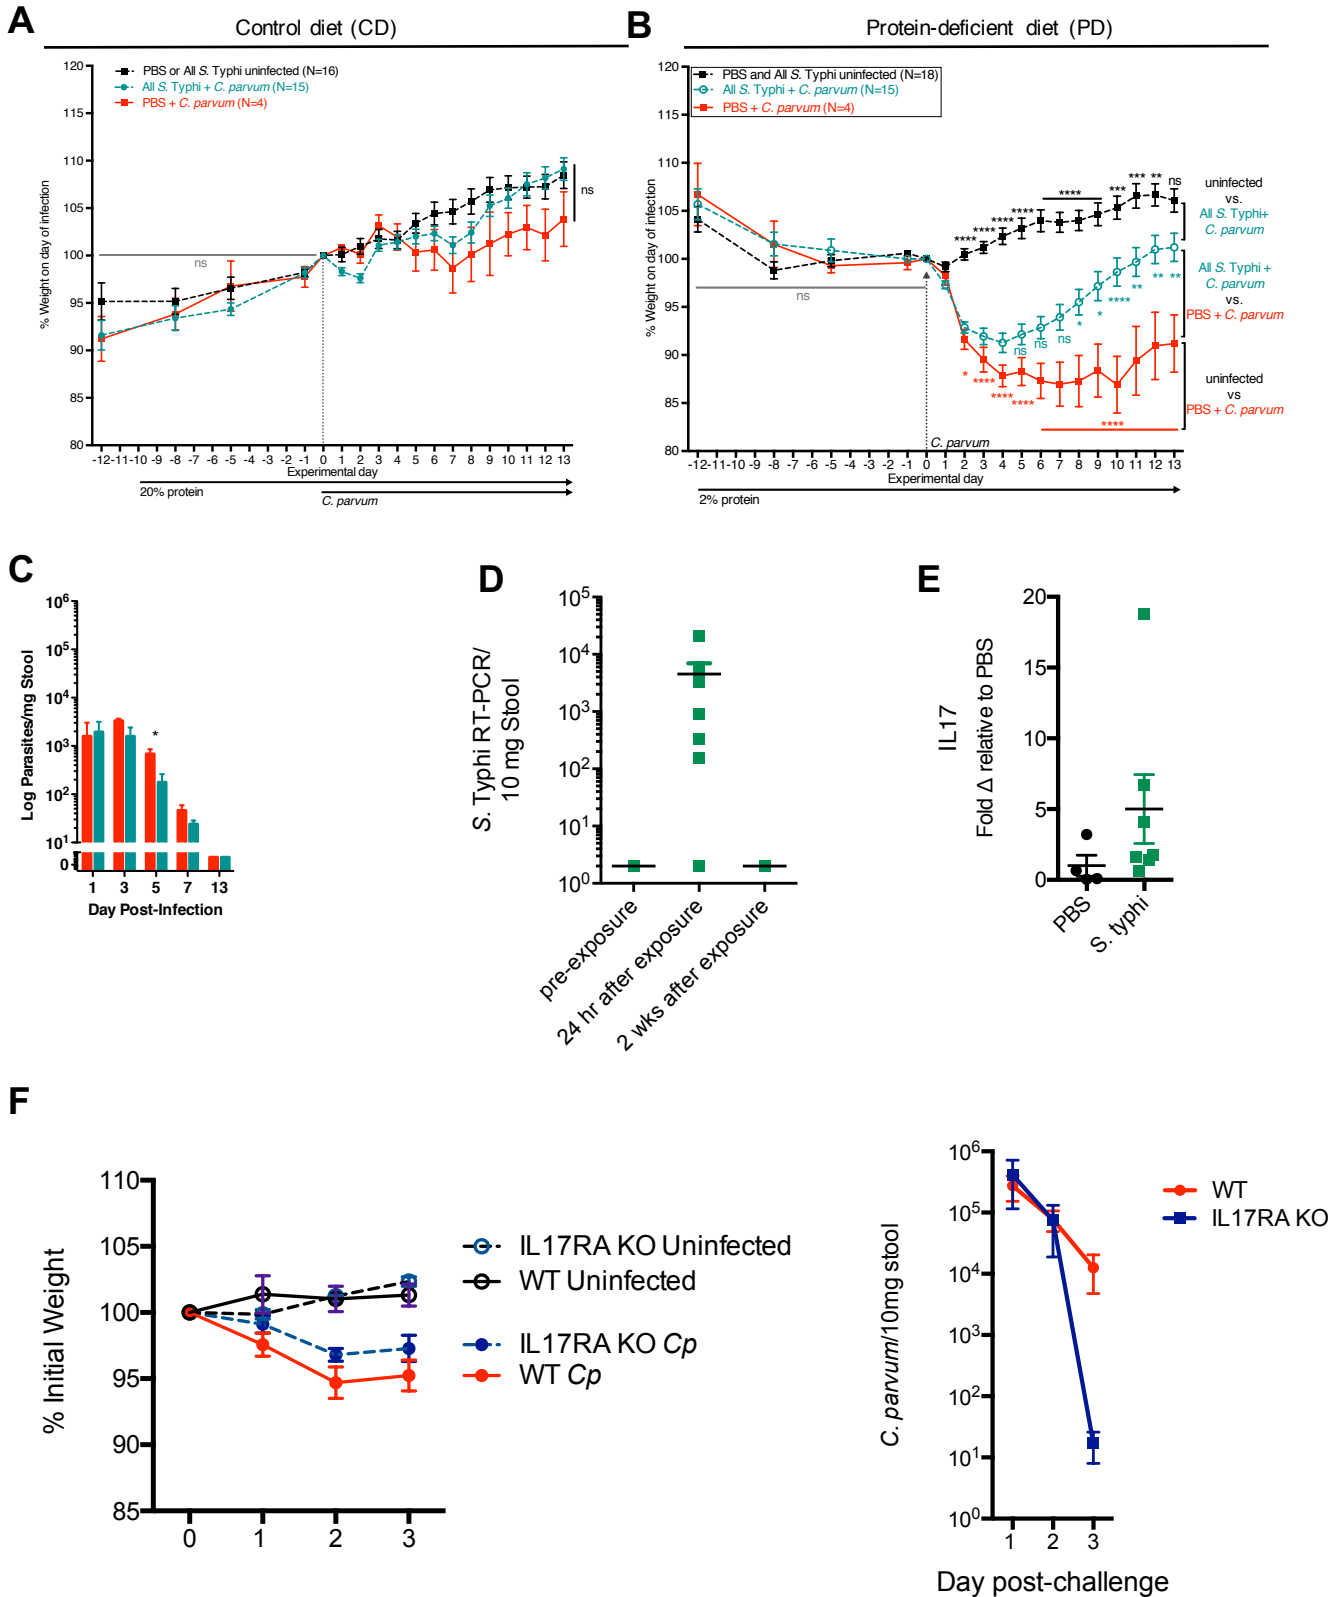

Supplement: pntd.0004820.s004.pdf [file pntd.0004820.s004.pdf]
