# Supplementary material for: Cryptosporidium Priming Is More Effective than Vaccine for Protection against Cryptosporidiosis in a Murine Protein Malnutrition Model
Source: PubMed Central journal article supplement (PMC4965189; doi:10.1371/journal.pntd.0004820), 2016-07-28

**A**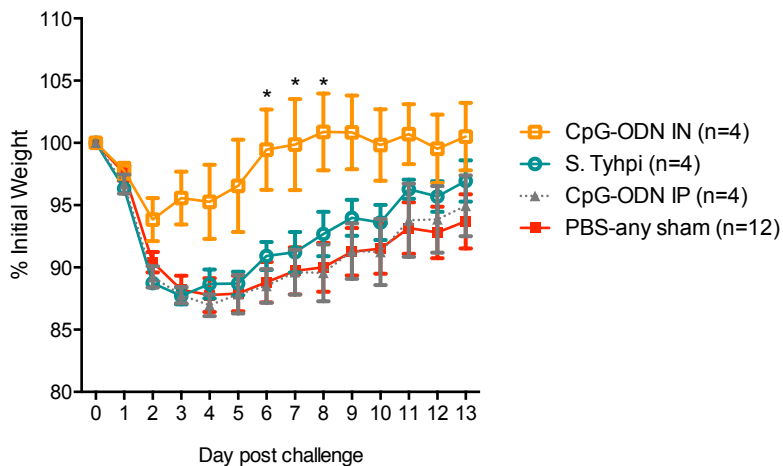**B**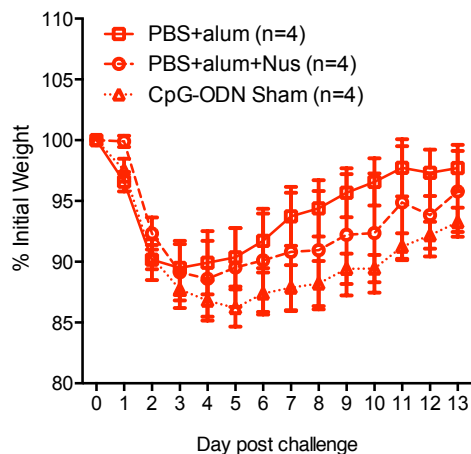**C**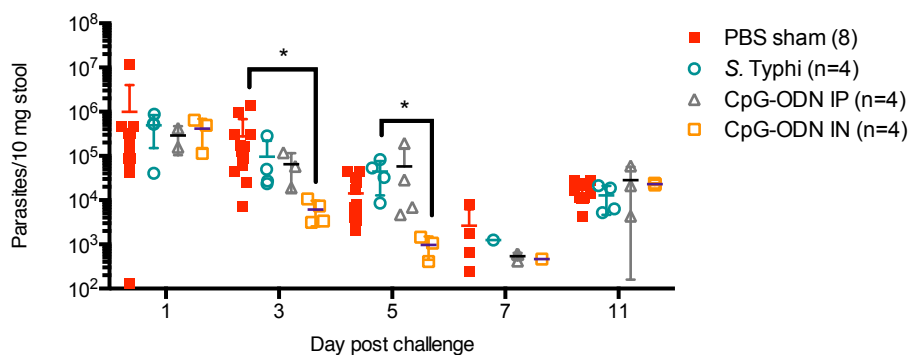**D**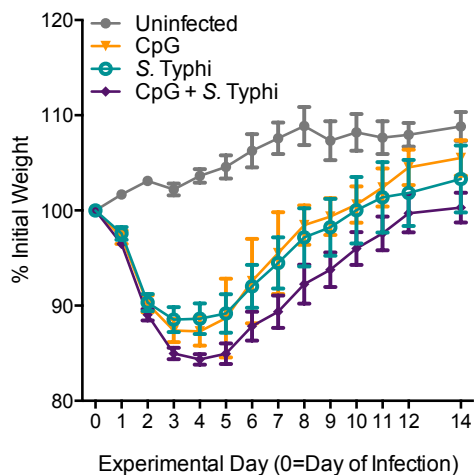**E**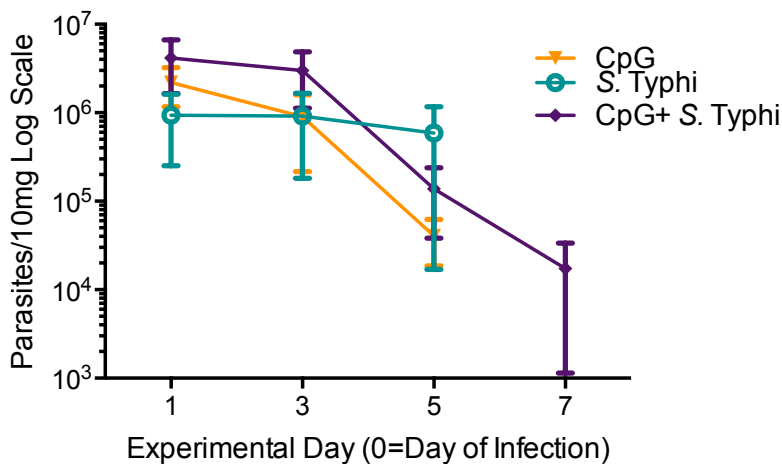

Supplement: pntd.0004820.s005.pdf [file pntd.0004820.s005.pdf]
